# Supplementary material
Source: PubMed Central journal article supplement (PMC3137013)
Supplement: supp_M014092_jlr.M014092-1.pdf [file supp_M014092_jlr.M014092-1.pdf]

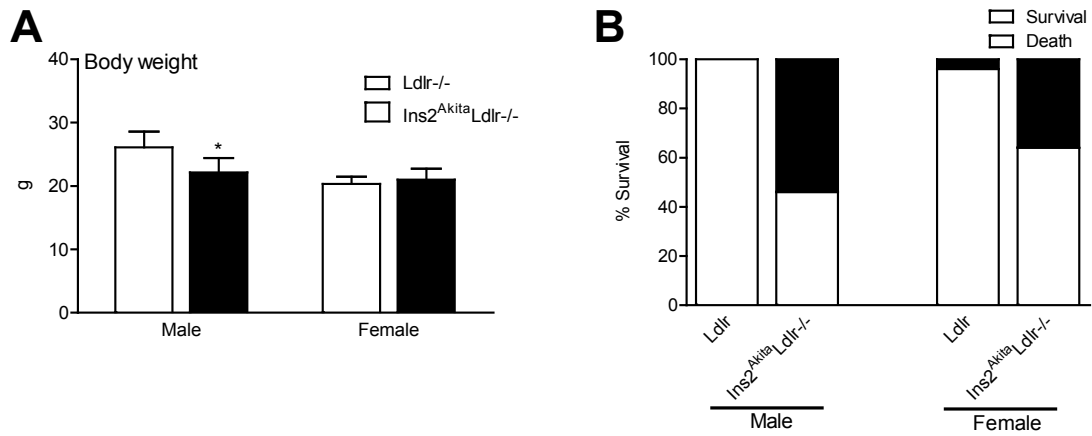

**Supplemental Figure 1. Akita mutation decreases body weight and increases mortality in Ldlr<sup>-/-</sup> mice.**

Four week old male and female Ldlr<sup>-/-</sup> and Ins2<sup>Akita</sup>Ldlr<sup>-/-</sup> mice were fed a semi-synthetic 0.02% cholesterol AIN76a diet for 16 weeks. (A) Body weight was measured in mice at 20 weeks old (n=8-14 per group, \*P<0.05). (B) The survival rates of Ldlr<sup>-/-</sup> and Ins2<sup>Akita</sup>Ldlr<sup>-/-</sup> mice were calculated based on the numbers of survived mice at ages of 20 weeks and the death between 4 and 20 weeks (n=25-36 per group).

**Supplemental Table 1. Primer Sets used for Quantitative Real-time PCR analysis**

| <b>Gene</b>  | <b>5' primer</b>                 | <b>3' primer</b>          |
|--------------|----------------------------------|---------------------------|
| Lxr $\alpha$ | AGGAGTGTCGACTTCGCAA              | CTCGGGGTCTGAGTT           |
| Lxr $\beta$  | AAGCAGGTGCCAGGGTTCT              | CTCTTCTTGCCGCTTCAGTTT     |
| Srebp1a      | GCGCCATGGACGAGCTG                | TTGGCACCTGGGCTGCT         |
| Srebp1c      | GGAGCCATGGATTGCACATT             | GCTTCCAGAGAGGAGGCCAG      |
| Srebp2       | GCGTTCTGGAGACCATGGA              | ACAAAGTTGCTCTGAAAACAAATCA |
| Abac1        | CCGAGGAAGACGTGGACACCTTC          | CCTCAGCCATGACCTGCCTTGTAG  |
| Abcg1        | GCTGTGCGTTTTGTGCTGTT             | TGCAGCTCCAATCAGTAGTCCTAA  |
| Lpl          | ACTCTGTGTCTAACTGCCACTTCAA        | ATACATTCCCGTTACCGTCCAT    |
| Hmgcr        | AGCTTGCCCGAATTGTATGTG            | TCTGTTGTGAACCATGTGACTTC   |
| Cyp7a1       | ACG GGTTGATTCCATACCTGGG          | TGTGTCCAAATGCCTTCGCAG     |
| Cyp27a1      | CTGCACTTCCTGCTGACCAAT            | TGTCAGTGTGTTGGATGTCGTG    |
| Cyp7b1       | TAGCCCTCTTTCCTCCACTCATA          | GAACCGATCGAACCTAAATTCCT   |
| Il1 $\alpha$ | GCACCTTACACCTACCAGAGT            | TGCAGGTCATTTAACCAAGTGG    |
| Il1 $\beta$  | GCAACTGTTCTGAACTCAACT            | ATCTTTTGGGGTCCGTCAACT     |
| Il2          | GTGCTCCTTGTCAACAGCG              | GGGGAGTTTCAGGTTCTCTGTA    |
| Tnf $\alpha$ | CCCATATACCTGGGAGGAGTCTTC         | CATTCCCTTCACAGAGCAATGAC   |
| Mcp1         | TTAAAAACCTGGATCGGAACCAA          | GCATTAGCTTCAGATTTACGGGT   |
| iNos         | CAGCACAGGAAATGTTTCAGC            | TAGCCAGCGTACCGGATGA       |
| Cox2         | AACTTTGGCATTGTGGAAGG             | GGATGCAGGGATGATGTTCT      |
| Ifn $\gamma$ | CATTGAAAGCCTAGAAAGTCTGAA<br>TAAC | TGGCTCTGCAGGATTTTCATG     |
| Gapdh        | AACTTTGGCATTGTGGAAGG             | GGATGCAGGGATGATGTTCT      |

**Supplemental Table 2. Microarray analysis of differentially regulated genes in the livers of Ins2<sup>Akit4</sup>LDLR<sup>-/-</sup> mice**

| ProbeID | Fold change | Symbol             | Accession      | Definition                                                                                                                    |
|---------|-------------|--------------------|----------------|-------------------------------------------------------------------------------------------------------------------------------|
| 6450746 | -98.841286  | Hsd3b5             | NM_008295.1    |                                                                                                                               |
| 4280292 | -67.8673    | Serpina1e          | NM_009247.1    |                                                                                                                               |
| 3890743 | -14.918378  | Serpina12          | NM_026535.1    |                                                                                                                               |
| 6620707 | -8.248004   | MGC25972           | NM_177406.2    |                                                                                                                               |
| 3440110 | -6.669583   | OTTMUSG00000000231 | NM_001009550.1 | Mus musculus predicted gene, OTTMUSG00000000231 (OTTMUSG00000000231), mRNA.                                                   |
| 6580403 | -5.3995256  | Thrsp              | NM_009381.2    | Mus musculus thyroid hormone responsive SPOT14 homolog (Rattus) (Thrsp), mRNA.                                                |
| 1820241 | -5.273101   | Mup5               | NM_008649.2    | Mus musculus major urinary protein 5 (Mup5), mRNA.                                                                            |
| 5550026 | -5.234726   | C730004C24Rik      | NM_001024719.2 | Mus musculus cytochrome P450, family 2, subfamily c, polypeptide 67 (Cyp2c67), mRNA.                                          |
| 2230678 | -5.1879315  | Mup4               | NM_008648.1    | Mus musculus major urinary protein 4 (Mup4), mRNA.                                                                            |
| 3170255 | -5.1159744  | Cml4               | NM_023455.2    | Mus musculus camello-like 4 (Cml4), mRNA.                                                                                     |
| 5290671 | -5.024461   | Fdps               | NM_134469      |                                                                                                                               |
| 1170092 | -4.9556894  | OTTMUSG00000007485 | NM_001012323.1 | Mus musculus predicted gene, OTTMUSG00000007485 (OTTMUSG00000007485), mRNA.                                                   |
| 160170  | -4.8080254  | Tff3               | NM_011575.1    | Mus musculus trefoil factor 3, intestinal (Tff3), mRNA.                                                                       |
| 620561  | -4.724983   | EG13909            | NM_144511.1    | Mus musculus predicted gene, EG13909 (EG13909), mRNA.                                                                         |
| 3890541 | -4.6789484  | Serpina4-ps1       | NR_002861.1    | Mus musculus serine (or cysteine) peptidase inhibitor, clade A, member 4, pseudogene 1 (Serpina4-ps1) on chromosome 12.       |
| 5690711 | -4.6738973  | C6                 | NM_016704.1    | Mus musculus complement component 6 (C6), mRNA.                                                                               |
| 6220070 | -4.4580393  | Elov3              | NM_007703.1    | Mus musculus elongation of very long chain fatty acids (FEN1/Elo2, SUR4/Elo3, yeast)-like 3 (Elov3), mRNA.                    |
| 360187  | -4.2275696  | Cyp7b1             | NM_007825.1    |                                                                                                                               |
| 1110554 | -4.086082   | Scp2               | NM_011327.1    | Mus musculus sterol carrier protein 2, liver (Scp2), mRNA.                                                                    |
| 1450242 | -4.019483   | Car3               | NM_007606.2    |                                                                                                                               |
| 1190148 | -3.6669505  | Sucnr1             | NM_032400.1    | Mus musculus succinate receptor 1 (Sucnr1), mRNA.                                                                             |
| 6450056 | -3.6565974  | Sqle               | NM_009270.2    |                                                                                                                               |
| 3130612 | -3.5295248  | Dio1               | NM_007860      |                                                                                                                               |
| 540020  | -3.51675    | Cyp51              | NM_020010      |                                                                                                                               |
| 6620053 | -3.5050912  | Csad               | NM_144942.1    | Mus musculus cysteine sulfinic acid decarboxylase (Csd), mRNA.                                                                |
| 7150324 | -3.4601424  | EG13909            | NM_144511.1    | Mus musculus predicted gene, EG13909 (EG13909), mRNA.                                                                         |
| 6040397 | -3.4271078  | Es1                | NM_007954.1    | Mus musculus esterase 1 (Es1), mRNA.                                                                                          |
| 2480592 | -3.374275   | Keg1               | NM_029550.1    | Mus musculus kidney expressed gene 1 (Keg1), mRNA.                                                                            |
| 7200050 | -3.2963803  | Hes6               | NM_019479.2    | Mus musculus hairy and enhancer of split 6 (Drosophila) (Hes6), mRNA.                                                         |
| 2030593 | -3.2905521  | Hspa8              | NM_031165.4    | Mus musculus heat shock protein 8 (Hspa8), mRNA.                                                                              |
| 2470717 | -3.2869387  | Aqp8               | NM_007474.1    | Mus musculus aquaporin 8 (Aqp8), mRNA.                                                                                        |
| 4900438 | -3.2748284  | Ppp1r3c            | NM_016854.1    | Mus musculus protein phosphatase 1, regulatory (inhibitor) subunit 3C (Ppp1r3c), mRNA.                                        |
| 1010008 | -3.264547   | Nudt7              | NM_024446.2    | Mus musculus nudix (nucleoside diphosphate linked moiety X)-type motif 7 (Nudt7), transcript variant 2, mRNA.                 |
| 3400255 | -3.2373502  | 4432416J03Rik      | NM_030069.1    | Mus musculus RIKEN cDNA 4432416J03 gene (4432416J03Rik), mRNA.                                                                |
| 7610520 | -3.1960707  | 2810007J24Rik      | NM_175250.3    | Mus musculus RIKEN cDNA 2810007J24 gene (2810007J24Rik), mRNA.                                                                |
| 4760672 | -3.183106   | LOC382044          | NM_001081372.1 | Mus musculus liver carboxylesterase N-like (LOC382044), mRNA.                                                                 |
| 6220553 | -3.151656   | C6                 | NM_016704.1    | Mus musculus complement component 6 (C6), mRNA.                                                                               |
| 6840020 | -3.0947726  | Sdro               | NM_027301.3    | Mus musculus orphan short chain dehydrogenase/reductase (Sdro), mRNA.                                                         |
| 3370332 | -3.0585957  | Hes6               | NM_019479.2    | Mus musculus hairy and enhancer of split 6 (Drosophila) (Hes6), mRNA.                                                         |
| 1510035 | -3.0483847  | Gstp1              | NM_013541.1    | Mus musculus glutathione S-transferase, pi 1 (Gstp1), mRNA.                                                                   |
| 5340722 | -3.008483   | Csrp3              | NM_013808.3    | Mus musculus cysteine and glycine-rich protein 3 (Csrp3), mRNA.                                                               |
| 1050079 | -2.9997687  | Cyp1a2             | NM_009993.2    | Mus musculus cytochrome P450, family 1, subfamily a, polypeptide 2 (Cyp1a2), mRNA.                                            |
| 6200376 | -2.99749    | Elf4a2             | NM_013506      |                                                                                                                               |
| 7650468 | -2.9912696  | Aacs               | NM_030210.1    | Mus musculus acetoacetyl-CoA synthetase (Aacs), mRNA.                                                                         |
| 2100470 | -2.975611   | Il1rap             | NM_008364.1    | Mus musculus interleukin 1 receptor accessory protein (Il1rap), transcript variant 1, mRNA.                                   |
| 5420685 | -2.9625194  | Nudt7              | NM_024437.1    | Mus musculus nudix (nucleoside diphosphate linked moiety X)-type motif 7 (Nudt7), transcript variant 1, mRNA.                 |
| 1030048 | -2.9472742  | Akr1c12            | NM_013777      |                                                                                                                               |
| 2810364 | -2.9217885  | Serpina3k          | NM_011458.1    | Mus musculus serine (or cysteine) peptidase inhibitor, clade A, member 3K (Serpina3k), mRNA.                                  |
| 240373  | -2.9016395  | D14Etd449e         | NM_025311      |                                                                                                                               |
| 70646   | -2.8987677  | Moxd1              | NM_021509.3    | Mus musculus monooxygenase, DBH-like 1 (Moxd1), mRNA.                                                                         |
| 4010398 | -2.8535998  | Acaa2              | NM_177470      |                                                                                                                               |
| 4250689 | -2.849819   | Ccrn4l             | NM_009834.1    | Mus musculus CCR4 carbon catabolite repression 4-like (S. cerevisiae) (Ccrn4l), mRNA.                                         |
| 3310424 | -2.8466337  | Acaa2              | NM_177470      |                                                                                                                               |
| 1470091 | -2.8400087  | Sort1              | NM_019972.2    | Mus musculus sortilin 1 (Sort1), mRNA.                                                                                        |
| 2470133 | -2.8260858  | Csrp3              | NM_013808.3    | Mus musculus cysteine and glycine-rich protein 3 (Csrp3), mRNA.                                                               |
| 6420253 | -2.808515   | Sc4mol             | NM_025436.1    | Mus musculus sterol-C4-methyl oxidase-like (Sc4mol), mRNA.                                                                    |
| 7040544 | -2.8037817  | Lisch7             | NM_017405.1    | Mus musculus lipolysis stimulated lipoprotein receptor (Lsr), mRNA.                                                           |
| 5090414 | -2.803588   | Acaa2              | NM_177470      |                                                                                                                               |
| 3390739 | -2.8013003  | 9530090G24Rik      | NM_145537      |                                                                                                                               |
| 6040292 | -2.760574   | Tgfb14             | NM_009366.1    |                                                                                                                               |
| 4860341 | -2.7538254  | Dio1               | NM_007860      |                                                                                                                               |
| 650121  | -2.742143   | Mcm10              | NM_027290.1    | Mus musculus minichromosome maintenance deficient 10 (S. cerevisiae) (Mcm10), mRNA.                                           |
| 3800446 | -2.7124999  | Ugt1a6a            | NM_145079.2    | Mus musculus UDP glucuronosyltransferase 1 family, polypeptide A6A (Ugt1a6a), mRNA.                                           |
| 4640348 | -2.7105625  | EG630499           | NM_001081015.1 | Mus musculus predicted gene, EG630499 (EG630499), mRNA.                                                                       |
| 5340068 | -2.7038872  | Il1rap             | NM_008364.1    | Mus musculus interleukin 1 receptor accessory protein (Il1rap), transcript variant 1, mRNA.                                   |
| 2030047 | -2.7025208  | Plg                | NM_008877.2    | Mus musculus plasminogen (Plg), mRNA.                                                                                         |
| 6580092 | -2.6618063  | Cml2               | NM_053096.2    |                                                                                                                               |
| 3850725 | -2.6493912  | Gck                | NM_010292.3    |                                                                                                                               |
| 4560424 | -2.6470902  | Eef2               | NM_007907.1    | Mus musculus eukaryotic translation elongation factor 2 (Eef2), mRNA.                                                         |
| 2120035 | -2.6166344  | Cyp2d26            | NM_029562.1    | Mus musculus cytochrome P450, family 2, subfamily d, polypeptide 26 (Cyp2d26), mRNA.                                          |
| 1410035 | -2.6133485  | Slico1b2           | NM_020495.1    | Mus musculus solute carrier organic anion transporter family, member 1b2 (Slico1b2), transcript variant 1, mRNA.              |
| 7000601 | -2.6071126  | Il1rap             | NM_008364.1    | Mus musculus interleukin 1 receptor accessory protein (Il1rap), transcript variant 1, mRNA.                                   |
| 2810468 | -2.600072   | Sort1              | NM_019972      |                                                                                                                               |
| 1690070 | -2.5989757  | Eef2               | NM_007907.1    | Mus musculus eukaryotic translation elongation factor 2 (Eef2), mRNA.                                                         |
| 2350484 | -2.5989687  | Eef2               | NM_007907.1    | Mus musculus eukaryotic translation elongation factor 2 (Eef2), mRNA.                                                         |
| 7160093 | -2.5795076  | Aqp8               | NM_007474.1    | Mus musculus aquaporin 8 (Aqp8), mRNA.                                                                                        |
| 7550427 | -2.5727606  | Fabp5              | NM_010634.1    |                                                                                                                               |
| 4150500 | -2.5418158  | Cyp4a12            | NM_172306.1    |                                                                                                                               |
| 6220307 | -2.5207717  | Sdro               | NM_027301.3    | Mus musculus orphan short chain dehydrogenase/reductase (Sdro), mRNA.                                                         |
| 6960731 | -2.5177824  | Cpb2               | NM_019775.2    | Mus musculus carboxypeptidase B2 (plasma) (Cpb2), mRNA.                                                                       |
| 7400292 | -2.5127048  | Hdh3               | NM_024257.1    | Mus musculus haloacid dehalogenase-like hydrolase domain containing 3 (Hdh3), mRNA.                                           |
| 1470554 | -2.50922    | Glud1              | NM_008133.3    | Mus musculus glutamate dehydrogenase 1 (Glud1), mRNA.                                                                         |
| 5080048 | -2.4985437  | Cyp2d26            | NM_029562.1    | Mus musculus cytochrome P450, family 2, subfamily d, polypeptide 26 (Cyp2d26), mRNA.                                          |
| 2970086 | -2.494693   | Rnaset2            | NM_029204.1    | Mus musculus ribonuclease T2 (Rnaset2), transcript variant 2, mRNA.                                                           |
| 240520  | -2.4859214  | Cpb2               | NM_019775.2    | Mus musculus carboxypeptidase B2 (plasma) (Cpb2), mRNA.                                                                       |
| 7040243 | -2.4439578  | D0H4S114           | NM_053078.3    | Mus musculus DNA segment, human D4S114 (D0H4S114), mRNA.                                                                      |
| 4220326 | -2.4308374  | Mcm10              | NM_027290.1    | Mus musculus minichromosome maintenance deficient 10 (S. cerevisiae) (Mcm10), mRNA.                                           |
| 4570333 | -2.4288478  | Acas2              | NM_019811.2    | Mus musculus acyl-CoA synthetase short-chain family member 2 (Acas2), mRNA.                                                   |
| 2510519 | -2.4283738  | Etfa               | NM_145615.2    | Mus musculus electron transferring flavoprotein, alpha polypeptide (Etfa), nuclear gene encoding mitochondrial protein, mRNA. |
| 1710309 | -2.4255846  | 1810047C23Rik      | NM_138668.1    | Mus musculus RIKEN cDNA 1810047C23 gene (1810047C23Rik), mRNA.                                                                |
| 6330561 | -2.4241812  | Lamp2              | NM_001017959.1 | Mus musculus lysosomal-associated membrane protein 2 (Lamp2), transcript variant 1, mRNA.                                     |
| 5670192 | -2.4189932  | Hspd1              | NM_010477.2    | Mus musculus heat shock protein 1 (chaperonin) (Hspd1), mRNA.                                                                 |
| 6940196 | -2.413873   | Aatk               | NM_007377.1    |                                                                                                                               |
| 1090343 | -2.3930862  | F12                | NM_021489.1    | Mus musculus coagulation factor XII (Hageman factor) (F12), mRNA.                                                             |
| 5310343 | -2.3920052  | Insig1             | NM_153526.2    | Mus musculus insulin induced gene 1 (Insig1), mRNA.                                                                           |

|         |            |               |                |                                                                                                                       |
|---------|------------|---------------|----------------|-----------------------------------------------------------------------------------------------------------------------|
| 4730220 | -2.3858068 | Mrc1          | NM_008625.1    | Mus musculus mannose receptor, C type 1 (Mrc1), mRNA.                                                                 |
| 5290358 | -2.3843257 | Gstp1         | NM_013541.1    | Mus musculus glutathione S-transferase, pi 1 (Gstp1), mRNA.                                                           |
| 6420403 | -2.3767965 | C4bp          | NM_007576.3    | Mus musculus complement component 4 binding protein (C4bp), mRNA.                                                     |
| 1980470 | -2.341134  | 1300013B24Rik | NM_026184.2    | Mus musculus ERO1-like beta (S. cerevisiae) (Ero1lb), mRNA.                                                           |
| 1940053 | -2.3254335 | EG13909       | NM_144511.1    | Mus musculus predicted gene, EG13909 (EG13909), mRNA.                                                                 |
| 2760463 | -2.325086  | Slc2a2        | NM_031197.1    | Mus musculus solute carrier family 2 (facilitated glucose transporter), member 2 (Slc2a2), mRNA.                      |
| 450673  | -2.322854  | Spes1         | NM_026911.1    | Mus musculus signal peptidase complex subunit 1 homolog (S. cerevisiae) (Spes1), mRNA.                                |
| 4480541 | -2.3219519 | Alas2         | NM_009653.1    |                                                                                                                       |
| 1030209 | -2.293369  | AW061290      | NM_201361.1    | Mus musculus expressed sequence AW061290 (AW061290), mRNA.                                                            |
| 3890609 | -2.2729723 | Lpin1         | NM_172950.2    | Mus musculus lipin 1 (Lpin1), transcript variant 1, mRNA.                                                             |
| 7320753 | -2.272744  | Hsd17b2       | NM_008290.1    |                                                                                                                       |
| 4810402 | -2.2696898 | C8a           | NM_146148.1    | Mus musculus complement component 8, alpha polypeptide (C8a), mRNA.                                                   |
| 4590468 | -2.2622886 | Cyb5r3        | NM_029787.2    | Mus musculus cytochrome b5 reductase 3 (Cyb5r3), mRNA.                                                                |
| 4760280 | -2.2585769 | F11           | NM_028066.1    | Mus musculus coagulation factor XI (F11), mRNA.                                                                       |
| 4920369 | -2.2570918 | Insig1        | NM_153526.2    | Mus musculus insulin induced gene 1 (Insig1), mRNA.                                                                   |
| 1190112 | -2.256873  | ldh1          | NM_010497      |                                                                                                                       |
| 6330482 | -2.244441  | Avpr1a        | NM_016847.2    | Mus musculus arginine vasopressin receptor 1A (Avpr1a), mRNA.                                                         |
| 1090577 | -2.2414904 | Mtch2         | NM_019758.2    | Mus musculus mitochondrial carrier homolog 2 (C. elegans) (Mtch2), nuclear gene encoding mitochondrial protein, mRNA. |
| 6350324 | -2.2404478 | Gna14         | NM_008137.2    | Mus musculus guanine nucleotide binding protein, alpha 14 (Gna14), mRNA.                                              |
| 4880736 | -2.2388432 | C8b           | NM_133882.1    | Mus musculus complement component 8, beta subunit (C8b), mRNA.                                                        |
| 3440070 | -2.2325554 | Slc25a25      | NM_146118.2    | Mus musculus solute carrier family 25 (mitochondrial carrier, phosphate carrier), member 25 (Slc25a25), mRNA.         |
| 2680110 | -2.2278974 | Insig2        | NM_178082.2    | Mus musculus insulin induced gene 2 (Insig2), mRNA.                                                                   |
| 3710040 | -2.2220085 | Ugt2a3        | NM_028094.1    | Mus musculus UDP glucuronosyltransferase 2 family, polypeptide A3 (Ugt2a3), mRNA.                                     |
| 1740326 | -2.2151837 | lth4          | NM_018746.1    | Mus musculus inter alpha-trypsin inhibitor, heavy chain 4 (lth4), mRNA.                                               |
| 1170564 | -2.2095072 | Hp            | NM_017370.1    | Mus musculus haptoglobin (Hp), mRNA.                                                                                  |
| 1440307 | -2.2028189 | H2-Ab1        | NM_207105.1    | Mus musculus histocompatibility 2, class II antigen A, beta 1 (H2-Ab1), mRNA.                                         |
| 2340082 | -2.2022305 | Aadac         | NM_023383.1    | Mus musculus arylacetamide deacetylase (esterase) (Aadac), mRNA.                                                      |
| 6290673 | -2.1984274 | Atp6v0d1      | NM_013477.2    | Mus musculus ATPase, H+ transporting, lysosomal V0 subunit D1 (Atp6v0d1), mRNA.                                       |
| 5340504 | -2.1947052 | F11           | NM_028066.1    | Mus musculus coagulation factor XI (F11), mRNA.                                                                       |
| 2970196 | -2.1876962 | 1110014L17Rik | NM_134020.1    | Mus musculus transmembrane emp24 protein transport domain containing 4 (Tmed4), mRNA.                                 |
| 1990451 | -2.1766126 | Atp5f1        | NM_009725.2    | Mus musculus ATP synthase, H+ transporting, mitochondrial F0 complex, subunit b, isoform 1 (Atp5f1), mRNA.            |
| 6650373 | -2.1761727 | 1200015F23Rik | NM_001033136.2 | Mus musculus RIKEN cDNA 1200015F23 gene (1200015F23Rik), mRNA. XM_924991                                              |
| 1500592 | -2.1750824 | Habp2         | NM_146101.1    | Mus musculus hyalurononic acid binding protein 2 (Habp2), mRNA.                                                       |
| 6520048 | -2.16716   | Masp2         | NM_001003893.2 | Mus musculus mannan-binding lectin serine peptidase 2 (Masp2), transcript variant 1, mRNA.                            |
| 7330228 | -2.1628683 | 2810439F02Rik | NM_028341.1    | Mus musculus RIKEN cDNA 2810439F02 gene (2810439F02Rik), mRNA.                                                        |
| 1660687 | -2.154367  | Ppap2b        | NM_080555.1    |                                                                                                                       |
| 130392  | -2.1538498 | Dct           | NM_010024.1    | Mus musculus dopachrome tautomerase (Dct), mRNA.                                                                      |
| 7100239 | -2.1517055 | Cpb2          | NM_019775.2    | Mus musculus carboxypeptidase B2 (plasma) (Cpb2), mRNA.                                                               |
| 1240414 | -2.150003  | Suclg1        | NM_019879.1    | Mus musculus succinate-CoA ligase, GDP-forming, alpha subunit (Suclg1), mRNA.                                         |
| 4220468 | -2.1418362 | Hnrpa2b1      | NM_182650.2    |                                                                                                                       |
| 1690678 | -2.1301732 | 0610007C21Rik | NM_027855.2    | Mus musculus RIKEN cDNA 0610007C21 gene (0610007C21Rik), transcript variant 1, mRNA.                                  |
| 3460358 | -2.1185172 | Rdh9          | NM_153133.1    |                                                                                                                       |
| 1470014 | -2.1183789 | Acad8         | NM_025862.1    |                                                                                                                       |
| 6660719 | -2.1158948 | Mgll          | NM_011844.3    | Mus musculus monoglyceride lipase (Mgll), mRNA.                                                                       |
| 3190646 | -2.1144884 | Aox3          | NM_023617.1    |                                                                                                                       |
| 5260600 | -2.1130493 | Ppp1r10       | NM_175934.2    | Mus musculus protein phosphatase 1, regulatory subunit 10 (Ppp1r10), mRNA.                                            |
| 6840156 | -2.1116416 | Sreb1         | NM_011480.1    | Mus musculus sterol regulatory element binding factor 1 (Sreb1), mRNA.                                                |
| 2750128 | -2.107892  | H2-Q8         | NM_023124.2    | Mus musculus histocompatibility 2, Q region locus 8 (H2-Q8), mRNA.                                                    |
| 4390113 | -2.104544  | Hp            | NM_017370.1    | Mus musculus haptoglobin (Hp), mRNA.                                                                                  |
| 460474  | -2.1028125 | 2310008M10Rik | NM_025509.2    | Mus musculus RIKEN cDNA 2310008M10 gene (2310008M10Rik), mRNA.                                                        |
| 780021  | -2.1001697 | D9Wsu20e      | NM_133718      |                                                                                                                       |
| 990338  | -2.0962195 | Nsdhl         | NM_010941.3    | Mus musculus NAD(P) dependent steroid dehydrogenase-like (Nsdhl), mRNA.                                               |
| 1230047 | -2.0919383 | Gjb2          | NM_008125.2    | Mus musculus gap junction membrane channel protein beta 2 (Gjb2), mRNA.                                               |
| 4210139 | -2.0909088 | Aqp1          | NM_007472.1    | Mus musculus aquaporin 1 (Aqp1), mRNA.                                                                                |
| 1010608 | -2.0802422 | Tmem14c       | NM_025387.1    | Mus musculus transmembrane protein 14C (Tmem14c), mRNA.                                                               |
| 1170471 | -2.0799453 | Mug2          | NM_008646.1    | Mus musculus muringlobulin 2 (Mug2), mRNA.                                                                            |
| 1110025 | -2.0745485 | Ppp1ca        | NM_031868.1    | Mus musculus protein phosphatase 1, catalytic subunit, alpha isoform (Ppp1ca), mRNA.                                  |
| 5900685 | -2.0719488 | EG231903      | NM_001039678.1 | Mus musculus paraoxon cluster neighbor (Phoxnb), mRNA.                                                                |
| 2260082 | -2.0706346 | Chrna4        | NM_015730.4    | Mus musculus cholinergic receptor, nicotinic, alpha polypeptide 4 (Chrna4), mRNA.                                     |
| 1240221 | -2.0699158 | Moxd1         | NM_021509.3    | Mus musculus monooxygenase, DBH-like 1 (Moxd1), mRNA.                                                                 |
| 6060661 | -2.064808  | Slc17a8       | NM_182959.2    | Mus musculus solute carrier family 17 (sodium-dependent inorganic phosphate cotransporter), member 8 (Slc17a8), mRNA. |
| 670161  | -2.0637865 | Sep15         | NM_053102      |                                                                                                                       |
| 7000634 | -2.0573165 | Hes6          | NM_019479.2    | Mus musculus hairy and enhancer of split 6 (Drosophila) (Hes6), mRNA.                                                 |
| 2340162 | -2.0549853 | Hao1          | NM_010403.1    | Mus musculus hydroxyacid oxidase 1, liver (Hao1), mRNA.                                                               |
| 5690327 | -2.0530512 | Tmem49        | NM_029478.2    | Mus musculus transmembrane protein 49 (Tmem49), mRNA.                                                                 |
| 4150097 | -2.050302  | Ppp1r3b       | NM_177741.2    |                                                                                                                       |
| 4810128 | -2.0464292 | C730027E14Rik | NM_146020.1    | Mus musculus RIKEN cDNA C730027E14 gene (C730027E14Rik), mRNA.                                                        |
| 1410050 | -2.046284  | LOC380712     | XM_354627.1    |                                                                                                                       |
| 4560139 | -2.035127  | Cnih          | NM_009919      |                                                                                                                       |
| 2100097 | -2.0327315 | Mvd           | NM_138656.1    | Mus musculus mevalonate (diphospho) decarboxylase (Mvd), mRNA.                                                        |
| 5260639 | -2.030951  | Mif2          | NM_145385.1    | Mus musculus myeloid leukemia factor 2 (Mif2), mRNA.                                                                  |
| 2320189 | -2.0307598 | Gnas          | NM_010309      |                                                                                                                       |
| 1580129 | -2.0299277 | Npr2          | NM_173788.2    |                                                                                                                       |
| 1580167 | -2.0298488 | Aqp1          | NM_007472.1    | Mus musculus aquaporin 1 (Aqp1), mRNA.                                                                                |
| 630725  | -2.028838  | Tmem66        | NM_026432.2    | Mus musculus transmembrane protein 66 (Tmem66), mRNA.                                                                 |
| 6200121 | -2.0268445 | Dars          | NM_145507.1    | Mus musculus aspartyl-tRNA synthetase (Dars), mRNA.                                                                   |
| 990537  | -2.026479  | 1600019D15Rik | NM_028975      |                                                                                                                       |
| 2650653 | -2.0245764 | Nsdhl         | NM_010941.3    | Mus musculus NAD(P) dependent steroid dehydrogenase-like (Nsdhl), mRNA.                                               |
| 7210039 | -2.0243747 | Gpc1          | NM_016696      |                                                                                                                       |
| 2480577 | -2.0181537 | Actb          | NM_007393.1    | Mus musculus actin, beta, cytoplasmic (Actb), mRNA.                                                                   |
| 6650520 | -2.0174704 | Oprs1         | NM_011014.1    | Mus musculus opioid receptor, sigma 1 (Oprs1), mRNA.                                                                  |
| 110181  | -2.0154502 | 1200003C05Rik | NM_024205.1    | Mus musculus RIKEN cDNA 1200003C05 gene (1200003C05Rik), mRNA.                                                        |
| 4830047 | -2.0152812 | Coq10b        | NM_001039710.1 | Mus musculus coenzyme Q10 homolog B (S. cerevisiae) (Coq10b), transcript variant 1, mRNA.                             |
| 3140500 | -2.0126176 | H2afz         | NM_016750.1    | Mus musculus H2A histone family, member Z (H2afz), mRNA.                                                              |
| 2490452 | -2.0111158 | Usp18         | NM_011909.1    | Mus musculus ubiquitin specific peptidase 18 (Usp18), mRNA.                                                           |
| 4480167 | -2.0109437 | Capn2         | NM_009794.1    | Mus musculus calpain 2 (Capn2), mRNA.                                                                                 |
| 1300040 | -2.008009  | Adh5          | NM_007410.2    | Mus musculus alcohol dehydrogenase 5 (class III), chi polypeptide (Adh5), mRNA.                                       |
| 3310347 | -2.007972  | Srm           | NM_009272.2    | Mus musculus spermidine synthase (Srm), mRNA.                                                                         |
| 5910431 | -2.006654  | Tram1         | NM_028173.1    | Mus musculus translocating chain-associating membrane protein 1 (Tram1), mRNA.                                        |
| 2230491 | -2.005863  | Kdelr2        | NM_025841.1    | Mus musculus KDEL (Lys-Asp-Glu-Leu) endoplasmic reticulum protein retention receptor 2 (Kdelr2), mRNA.                |
| 3130066 | -1.9495593 | Nox4          | NM_015760.2    | Mus musculus NADPH oxidase 4 (Nox4), mRNA.                                                                            |
| 4540382 | -1.9456974 | Egfr          | NM_007912.4    | Mus musculus epidermal growth factor receptor (Egfr), transcript variant 2, mRNA.                                     |
| 2650753 | -1.8086075 | Cyp2d9        | NM_010006.1    | Mus musculus cytochrome P450, family 2, subfamily d, polypeptide 9 (Cyp2d9), mRNA.                                    |
| 5260367 | -1.8080443 | Cyp1a2        | NM_009993.2    | Mus musculus cytochrome P450, family 1, subfamily a, polypeptide 2 (Cyp1a2), mRNA.                                    |
| 1850730 | -1.7847711 | LOC620807     | NM_001081285.1 | Mus musculus novel member of the major urinary protein (Mup) gene family (LOC620807), mRNA.                           |
| 2810487 | 1.50665    | Slpi          | NM_011414.1    | Mus musculus secretory leukocyte peptidase inhibitor (Slpi), mRNA.                                                    |
| 3460296 | 1.6841825  | Anxa2         | NM_007585.2    |                                                                                                                       |

|         |           |               |                |                                                                                                            |
|---------|-----------|---------------|----------------|------------------------------------------------------------------------------------------------------------|
| 7050487 | 1.7108731 | Cd63          | NM_007653.1    |                                                                                                            |
| 2000398 | 1.8209116 | Hba-a1        | NM_008218.1    | Mus musculus hemoglobin alpha, adult chain 1 (Hba-a1), mRNA.                                               |
| 7330278 | 1.8793817 | Lgals1        | NM_008495.1    |                                                                                                            |
| 3710544 | 1.9063638 | Mgst3         | NM_025569.1    | Mus musculus microsomal glutathione S-transferase 3 (Mgst3), mRNA.                                         |
| 110292  | 1.9685271 | Wfdc15        | NM_138685.2    | Mus musculus WAP four-disulfide core domain 15B (Wfdc15b), transcript variant 1, mRNA.                     |
| 4210129 | 1.9797294 | Socs2         | NM_007706.1    |                                                                                                            |
| 4780040 | 2.0057118 | Abcc3         | XM_358306.1    |                                                                                                            |
| 4890743 | 2.016324  | Tm6sf2        | NM_181540.2    | Mus musculus transmembrane 6 superfamily member 2 (Tm6sf2), mRNA.                                          |
| 2480719 | 2.0226586 | Flot1         | NM_008027.1    |                                                                                                            |
| 7560338 | 2.0257423 | Ass1          | NM_007494.2    | Mus musculus argininosuccinate synthetase 1 (Ass1), mRNA.                                                  |
| 2510390 | 2.02744   | Idh2          | NM_173011.1    | Mus musculus isocitrate dehydrogenase 2 (NADP+), mitochondrial (Idh2), mRNA.                               |
| 4780066 | 2.0357263 | Csrp1         | NM_007791.2    | Mus musculus cysteine and glycine-rich protein 1 (Csrp1), mRNA.                                            |
| 730110  | 2.0400376 | Por           | NM_008898.1    | Mus musculus P450 (cytochrome) oxidoreductase (Por), mRNA.                                                 |
| 4860598 | 2.0484593 | Map3k7ip1     | NM_025609.2    | Mus musculus mitogen-activated protein kinase kinase kinase 7 interacting protein 1 (Map3k7ip1), mRNA.     |
| 4900142 | 2.050635  | Mapkapk2      | NM_008551.1    | Mus musculus MAP kinase-activated protein kinase 2 (Mapkapk2), mRNA.                                       |
| 4860088 | 2.0521526 | Akt1s1        | NM_026270.1    | Mus musculus AKT1 substrate 1 (proline-rich) (Akt1s1), mRNA.                                               |
| 6060468 | 2.052928  | Bola2         | NM_175103.2    | Mus musculus bolA-like 2 (E. coli) (Bola2), mRNA.                                                          |
| 2350324 | 2.0580964 | Gstt3         | NM_133994.2    | Mus musculus glutathione S-transferase, theta 3 (Gstt3), mRNA.                                             |
| 1070091 | 2.0772054 | Gmfg          | NM_022024.1    |                                                                                                            |
| 2120195 | 2.108044  | St5           | NM_029811.1    |                                                                                                            |
| 7050440 | 2.1200566 | St5           | NM_029811.1    |                                                                                                            |
| 2140022 | 2.124925  | Cdc42ep5      | NM_021454.3    | Mus musculus CDC42 effector protein (Rho GTPase binding) 5 (Cdc42ep5), mRNA.                               |
| 1580445 | 2.134949  | Lmyc1         | NM_008506.2    | Mus musculus v-myc myelocytomatosis viral oncogene homolog 1, lung carcinoma derived (avian) (Myc1), mRNA. |
| 460747  | 2.1396449 | Fbxo21        | NM_145564.2    | Mus musculus F-box protein 21 (Fbxo21), mRNA.                                                              |
| 4850612 | 2.1409142 | Dscr11        | NM_207649.1    | Mus musculus regulator of calcineurin 2 (Rcan2), transcript variant 1, mRNA.                               |
| 7400392 | 2.1538346 | Sepw1         | NM_009156.1    |                                                                                                            |
| 6770114 | 2.161094  | Trem2         | NM_031254.2    | Mus musculus triggering receptor expressed on myeloid cells 2 (Trem2), mRNA.                               |
| 2970307 | 2.1690018 | Rhbd2         | NM_183163.2    | Mus musculus rhomboid, veinlet-like 2 (Drosophila) (Rhbd2), mRNA.                                          |
| 2230019 | 2.1798692 | 1190005I06Rik | NM_197988.1    | Mus musculus RIKEN cDNA 1190005I06 gene (1190005I06Rik), mRNA.                                             |
| 270722  | 2.196207  | MGC106740     | NM_001025383.1 | Mus musculus predicted gene, OTTMUSG00000017677 (OTTMUSG00000017677), mRNA.                                |
| 2100608 | 2.1991613 | Cyp2b20       | NM_009999      |                                                                                                            |
| 7610097 | 2.2083037 | Spink3        | NM_009258.2    |                                                                                                            |
| 730025  | 2.2097547 | Gstm2         | NM_008183.2    | Mus musculus glutathione S-transferase, mu 2 (Gstm2), mRNA.                                                |
| 3360280 | 2.22012   | Zap70         | NM_009539.2    | Mus musculus zeta-chain (TCR) associated protein kinase (Zap70), mRNA.                                     |
| 2970544 | 2.2442906 | Zap70         | NM_009539.2    | Mus musculus zeta-chain (TCR) associated protein kinase (Zap70), mRNA.                                     |
| 3130750 | 2.281593  | Ung           | NM_011677.1    |                                                                                                            |
| 130634  | 2.2819686 | Ddit4         | NM_029083.1    | Mus musculus DNA-damage-inducible transcript 4 (Ddit4), mRNA.                                              |
| 7320053 | 2.2955827 | Gpx3          | NM_008161.1    | Mus musculus glutathione peroxidase 3 (Gpx3), mRNA.                                                        |
| 1570594 | 2.3007054 | Socs3         | NM_007707.2    | Mus musculus suppressor of cytokine signaling 3 (Socs3), mRNA.                                             |
| 4280056 | 2.329025  | Trib3         | NM_144554.1    |                                                                                                            |
| 6400719 | 2.3488345 | Saa3          | NM_011315      |                                                                                                            |
| 1980608 | 2.3507454 | D4Erd429e     | NM_001025106.1 | Mus musculus DNA segment, Chr 4, ERATO Doi 429, expressed (D4Erd429e), transcript variant 1, mRNA.         |
| 2470086 | 2.3529687 | Slc39a4       | NM_028064.2    | Mus musculus solute carrier family 39 (zinc transporter), member 4 (Slc39a4), mRNA.                        |
| 3830296 | 2.356381  | Gal3st1       | NM_016922.2    | Mus musculus galactose-3-O-sulfotransferase 1 (Gal3st1), mRNA.                                             |
| 4070201 | 2.3669646 | Vldlr         | NM_013703.1    | Mus musculus very low density lipoprotein receptor (Vldlr), mRNA.                                          |
| 150114  | 2.3863676 | Chi3l1        | NM_007695.1    | Mus musculus chitinase 3-like 1 (Chi3l1), mRNA.                                                            |
| 2360528 | 2.3986454 | Hpd           | NM_008277.1    | Mus musculus 4-hydroxyphenylpyruvic acid dioxygenase (Hpd), mRNA.                                          |
| 6560703 | 2.3993177 | H6pd          | NM_173371.2    | Mus musculus hexose-6-phosphate dehydrogenase (glucose 1-dehydrogenase) (H6pd), mRNA.                      |
| 3370551 | 2.4066198 | Nnmt          | NM_010924.1    | Mus musculus nicotinamide N-methyltransferase (Nnmt), mRNA.                                                |
| 2100215 | 2.4177208 | Irs2          | NM_001081212.1 | Mus musculus insulin receptor substrate 2 (Irs2), mRNA.                                                    |
| 1450333 | 2.4214277 | Clecsf12      | NM_020008      |                                                                                                            |
| 2650154 | 2.4273634 | Aldh1b1       | NM_028270.2    | Mus musculus aldehyde dehydrogenase 1 family, member B1 (Aldh1b1), mRNA.                                   |
| 5310079 | 2.469809  | Prf1          | NM_011073.2    | Mus musculus perforin 1 (pore forming protein) (Prf1), mRNA.                                               |
| 3400646 | 2.4741106 | Ptpns1        | XM_149178.1    |                                                                                                            |
| 6940184 | 2.4754598 | Ccl4          | NM_013652.1    |                                                                                                            |
| 4210619 | 2.4856105 | Mgst3         | NM_025569.1    | Mus musculus microsomal glutathione S-transferase 3 (Mgst3), mRNA.                                         |
| 3450102 | 2.4874983 | Slc24a6       | NM_133221.1    | Mus musculus solute carrier family 24 (sodium/potassium/calcium exchanger), member 6 (Slc24a6), mRNA.      |
| 6660176 | 2.5067897 | Stat3         | NM_011486.2    |                                                                                                            |
| 1500301 | 2.5292456 | Tuba8         | NM_017379      |                                                                                                            |
| 4640358 | 2.5736706 | Ncor1         | NM_011308.1    |                                                                                                            |
| 1780037 | 2.5753164 | BC030476      | NM_173421.1    | Mus musculus cDNA sequence BC030476 (BC030476), mRNA.                                                      |
| 5310360 | 2.60978   | Stat3         | NM_011486.2    |                                                                                                            |
| 5360300 | 2.6193829 | Lpl           | NM_008509.1    |                                                                                                            |
| 6350288 | 2.6222072 | Orm2          | NM_011016.1    |                                                                                                            |
| 2320176 | 2.6567092 | Rnf125        | NM_026301.1    | Mus musculus ring finger protein 125 (Rnf125), mRNA.                                                       |
| 540300  | 2.6877487 | 1810008K03Rik | NM_026929.2    | Mus musculus ChaC, cation transport regulator-like 1 (E. coli) (Chac1), mRNA.                              |
| 4480639 | 2.6949115 | Vldlr         | NM_013703.1    | Mus musculus very low density lipoprotein receptor (Vldlr), mRNA.                                          |
| 5220279 | 2.7476487 | Mt1           | NM_013602.2    | Mus musculus metallothionein 1 (Mt1), mRNA.                                                                |
| 5560754 | 2.748223  | Ly6d          | NM_010742.1    | Mus musculus lymphocyte antigen 6 complex, locus D (Ly6d), mRNA.                                           |
| 1980603 | 2.752739  | S100a9        | NM_009114.1    | Mus musculus S100 calcium binding protein A9 (calgranulin B) (S100a9), mRNA.                               |
| 510474  | 2.788553  | Lgals3        | NM_010705.1    | Mus musculus lectin, galactose binding, soluble 3 (Lgals3), mRNA.                                          |
| 4890768 | 2.7889364 | 1700067K01Rik | NM_183097.1    | Mus musculus RIKEN cDNA 1700067K01 gene (1700067K01Rik), mRNA.                                             |
| 1190546 | 2.7967541 | S100a8        | NM_013650.1    |                                                                                                            |
| 6560497 | 2.8397925 | Nnmt          | NM_010924.1    | Mus musculus nicotinamide N-methyltransferase (Nnmt), mRNA.                                                |
| 6660403 | 2.869217  | Serpina6      | NM_007618.2    | Mus musculus serine (or cysteine) peptidase inhibitor, clade A, member 6 (Serpina6), mRNA.                 |
| 6020441 | 2.8747478 | Fmo3          | NM_008030.1    | Mus musculus flavin containing monooxygenase 3 (Fmo3), mRNA.                                               |
| 6330377 | 2.8930984 | Gadd45g       | NM_011817.1    | Mus musculus growth arrest and DNA-damage-inducible 45 gamma (Gadd45g), mRNA.                              |
| 5900577 | 2.97985   | Vldlr         | NM_013703.1    | Mus musculus very low density lipoprotein receptor (Vldlr), mRNA.                                          |
| 4070142 | 3.010534  | Gadd45g       | NM_011817.1    | Mus musculus growth arrest and DNA-damage-inducible 45 gamma (Gadd45g), mRNA.                              |
| 4290017 | 3.1079502 | Kiss1         | NM_178260      |                                                                                                            |
| 4890626 | 3.2244468 | Lcn2          | NM_008491.1    | Mus musculus lipocalin 2 (Lcn2), mRNA.                                                                     |
| 2510646 | 3.2538488 | Ly6d          | NM_010742.1    | Mus musculus lymphocyte antigen 6 complex, locus D (Ly6d), mRNA.                                           |
| 1410224 | 3.7265804 | EG243881      | NM_001081148.1 | Mus musculus cytochrome P450, family 2, subfamily b, polypeptide 23 (Cyp2b23), mRNA.                       |
| 1260164 | 3.8790767 | Asns          | NM_012055.1    | Mus musculus asparagine synthetase (Asns), mRNA.                                                           |
| 2190196 | 4.5825095 | Mt2           | NM_008630.1    |                                                                                                            |
| 60364   | 4.792408  | BC013476      | NM_201640.1    | Mus musculus cytochrome P450, family 4, subfamily a, polypeptide 31 (Cyp4a31), mRNA.                       |
| 2940592 | 4.9268265 | Gsta1         | NM_008181.2    | Mus musculus glutathione S-transferase, alpha 1 (Ya) (Gsta1), mRNA.                                        |
| 3710465 | 5.168958  | Gsta2         | NM_008182.1    |                                                                                                            |
| 5960543 | 5.588551  | Mmd2          | NM_175217.3    |                                                                                                            |
| 4780164 | 6.8696165 | Krt1-23       | NM_033373.1    | Mus musculus keratin 23 (Krt23), mRNA.                                                                     |
| 4670228 | 8.579869  | Gpnmb         | NM_053110.2    | Mus musculus glycoprotein (transmembrane) nmb (Gpnmb), mRNA.                                               |
| 670653  | 10.839069 | Cyp17a1       | NM_007809.2    | Mus musculus cytochrome P450, family 17, subfamily a, polypeptide 1 (Cyp17a1), mRNA.                       |
| 1940273 | 24.879896 | Cyp4a14       | NM_007822.1    | Mus musculus cytochrome P450, family 4, subfamily a, polypeptide 14 (Cyp4a14), mRNA.                       |
| 1940504 | 25.820763 | Cyp2b9        | NM_010000.1    |                                                                                                            |

Notes : Genes with >= 1.50 fold difference (down or up) in the livers of Ins2<sup>Akita</sup>/LDLR<sup>-/-</sup> were listed.
